# Supplementary material for: Preventing foot ulceration in diabetes: systematic review and meta-analyses of RCT data
Source: Springer Nature journal article supplement (doi:10.1007/s00125-019-05020-7), 2019-11-27
Supplement: MOESM1 [file 17439248]

ESM table 1. Medline Search

| #   | Searches                                                       |
|-----|----------------------------------------------------------------|
| 1.  | MeSH descriptor: [Foot Orthoses] explode all trees             |
| 2.  | MeSH descriptor: [Shoes] explode all trees                     |
| 3.  | MeSH descriptor: [Health Education] explode all trees          |
| 4.  | MeSH descriptor: [Primary Health Care] explode all trees       |
| 5.  | MeSH descriptor: [Emollients] explode all trees                |
| 6.  | insole*                                                        |
| 7.  | footwear*                                                      |
| 8.  | educat*                                                        |
| 9.  | specialist car*                                                |
| 10. | multi disciplinary team*                                       |
| 11. | multidisciplinary team*                                        |
| 12. | routine podiatry car*                                          |
| 13. | MeSH descriptor: [General Practice] explode all trees          |
| 14. | MeSH descriptor: [Community Health Services] explode all trees |
| 15. | off load*                                                      |
| 16. | offload*                                                       |
| 17. | emollient*                                                     |
| 18. | shoe*                                                          |
| 19. | {or #1-#18}                                                    |
| 20. | MeSH descriptor: [Foot] explode all trees                      |
| 21. | MeSH descriptor: [Foot Diseases] explode all trees             |

|     |                                                             |
|-----|-------------------------------------------------------------|
| 22. | MeSH descriptor: [Diabetic Foot] explode all trees          |
| 23. | MeSH descriptor: [Diabetic Neuropathies] explode all trees  |
| 24. | MeSH descriptor: [Diabetes Mellitus] explode all trees      |
| 25. | MeSH descriptor: [Diabetic Angiopathies] explode all trees  |
| 26. | MeSH descriptor: [Diabetes Complications] explode all trees |
| 27. | MeSH descriptor: [Podiatry] explode all trees               |
| 28. | MeSH descriptor: [Foot Ulcer] explode all trees             |
| 29. | MeSH descriptor: [Skin Ulcer] explode all trees             |
| 30. | MeSH descriptor: [Ischemia] explode all trees               |
| 31. | MeSH descriptor: [Bacterial Infections] explode all trees   |
| 32. | diabet* near/3 ulcer*                                       |
| 33. | diabet* near/3 (foot or feet)                               |
| 34. | diabet* near/3 wound*                                       |
| 35. | diabet* near/3 amputat*                                     |
| 36. | {or #20-#35}                                                |
| 37. | #19 and #36                                                 |
